# Supplementary material
Source: MDPI journal article supplement (https://www.mdpi.com/2073-4433/15/5/600)
Supplement: s1 [file s1]

# Supplementary Materials: Observation-Based Ozone Formation Rules by Gradient Boosting Decision Trees Model in Typical Chemical Industrial Parks

Nana Cheng <sup>1,2</sup>, Deji Jing <sup>3</sup>, Zhenyu Gu <sup>1,2</sup>, Xingnong Cai <sup>3</sup>, Zhanhong Shi <sup>3</sup>, Sujing Li <sup>3</sup>, Liang Chen <sup>4</sup>, Wei Li <sup>3,\*</sup> and Qiaoli Wang <sup>5,\*</sup>

**Table S1.** Statistics of VOC species monitored in the park.

| Groups  | Number | species                 | Groups      | Number | species                  |
|---------|--------|-------------------------|-------------|--------|--------------------------|
| Alkanes | v1     | Ethane                  | Aromatics   | v36    | Benzene                  |
|         | v2     | Propane                 |             | v37    | Toluene                  |
|         | v3     | n-Butane                |             | v38    | Ethyl benzene            |
|         | v4     | Isobutane               |             | v39    | o-Xylene                 |
|         | v5     | Isopentane              |             | v40    | Isopropyl benzene        |
|         | v6     | 2,2-Dimethyl butane     |             | v41    | n-Propyl benzene         |
|         | v7     | 2,3-Dimethyl butane     |             | v42    | 1,2,3-Trimethyl benzene  |
|         | v8     | Cyclopentane            |             | v43    | 1,2,4-Trimethyl benzene  |
|         | v9     | 2-Methyl pentane        |             | v44    | 1,3,5-Trimethyl benzene  |
|         | v10    | n-Hexane                |             | v45    | m-Ethyl toluene          |
|         | v11    | Cyclohexane             |             | v46    | p-Ethyl toluene          |
|         | v12    | Methyl cyclopentane     |             | v47    | o-Ethyl toluene          |
|         | v13    | 3-Methyl hexane         |             | v48    | m-Diethyl benzene        |
|         | v14    | 2,2,4-Trimethyl pentane |             | v49    | Styrene                  |
|         | v15    | 2,3,4-Trimethyl pentane | Halocarbons | v50    | Methyl chloride          |
|         | v16    | n-Heptane               |             | v51    | Vinyl chloride           |
|         | v17    | Methyl cyclohexane      |             | v52    | Trifluorotrichloroethane |
|         | v18    | 2-Methyl heptane        |             | v53    | Dichloromethane          |
|         | v19    | 3-Methyl heptane        |             | v54    | 1,1-Dichloroethane       |
|         | v20    | n-Octane                |             | v55    | cis-1,2-Dichloroethene   |
|         | v21    | n-Nonane                |             | v56    | Chloroform               |
|         | v22    | n-Decane                |             | v57    | 1,1,1-Trichloroethane    |
|         | v23    | n-Undecane              |             | v58    | 1,2-Dichloroethane       |
|         | v24    | n-Dodecane              |             | v59    | Carbon tetrachloride     |
|         | v25    | Ethene                  |             | v60    | Trichloroethylene        |

|                    |     |                 |     |                           |
|--------------------|-----|-----------------|-----|---------------------------|
| Alkenes and Ethyne | v26 | Ethyne          | v61 | 1,2-Dichloropropane       |
|                    | v27 | Propene         | v62 | cis-1,3-Dichloropropene   |
|                    | v28 | 1-Butene        | v63 | trans-1,3-Dichloropropene |
|                    | v29 | trans-2-Butene  | v64 | 1,1,2-Trichloroethane     |
|                    | v30 | cis-2-Butene    | v65 | Perchloroethylene         |
|                    | v31 | 1,3-Butadiene   | v66 | 1,2-Dibromoethane         |
|                    | v32 | 1-Pentene       | v67 | Monochlorobenzene         |
|                    | v33 | trans-2-Pentene | v68 | m-Dichlorobenzene         |
|                    | v34 | cis-2-Pentene   | v69 | p-Dichlorobenzene         |
|                    | v35 | Isoprene        | v70 | o-Dichlorobenzene         |

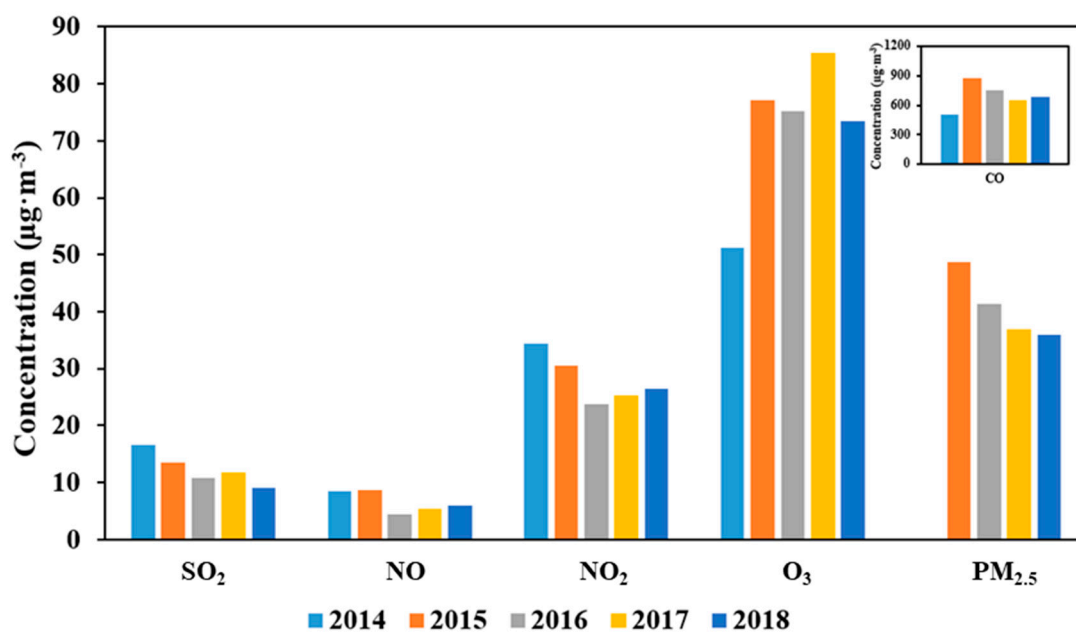

Figure S1. Average annual variations for 6 conventional atmospheric pollutants.

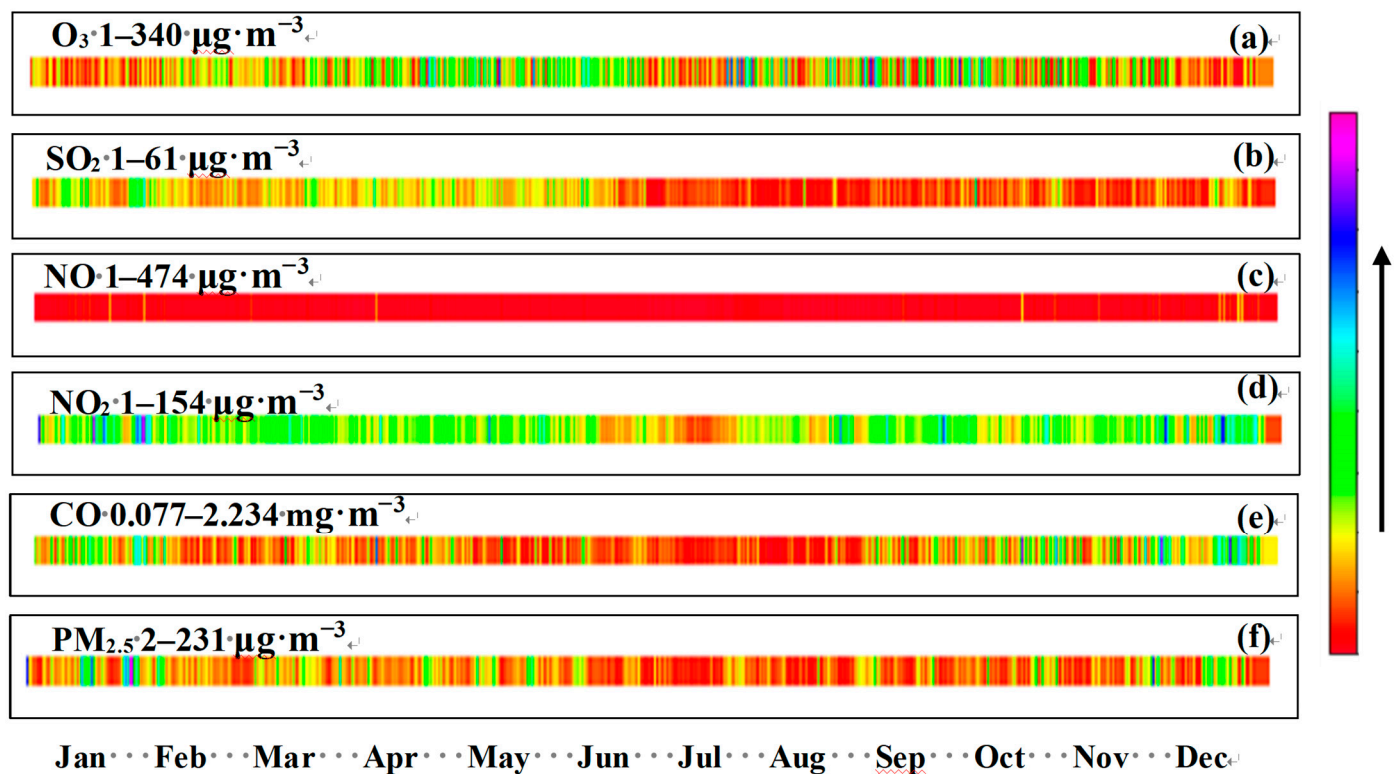

Figure S2. Temporal variations in  $\text{O}_3$  (a),  $\text{SO}_2$  (b),  $\text{NO}$  (c),  $\text{NO}_2$  (d),  $\text{CO}$  (e), and  $\text{PM}_{2.5}$  (f) levels in 2018.

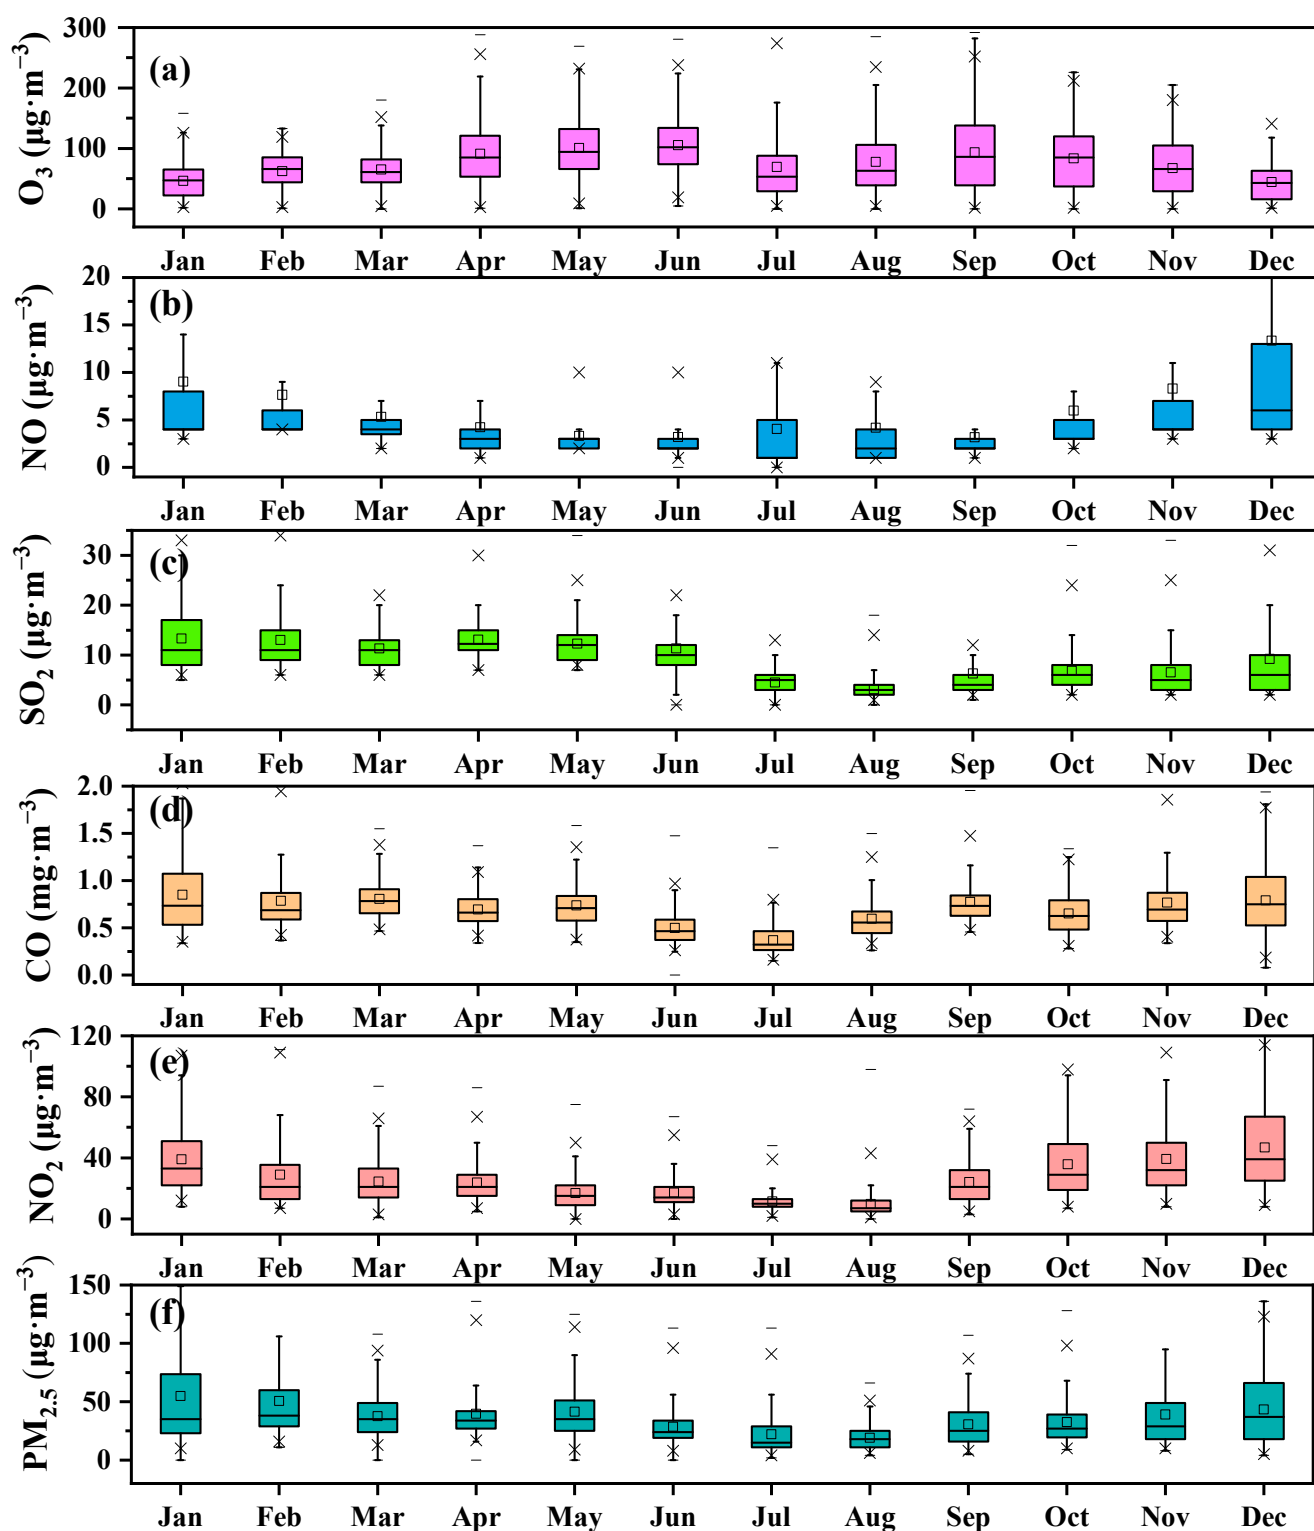

Figure S3. Average monthly variations in  $\text{O}_3$  (a),  $\text{SO}_2$  (b), NO (c),  $\text{NO}_2$  (d), CO (e), and  $\text{PM}_{2.5}$  (f) levels in 2018.

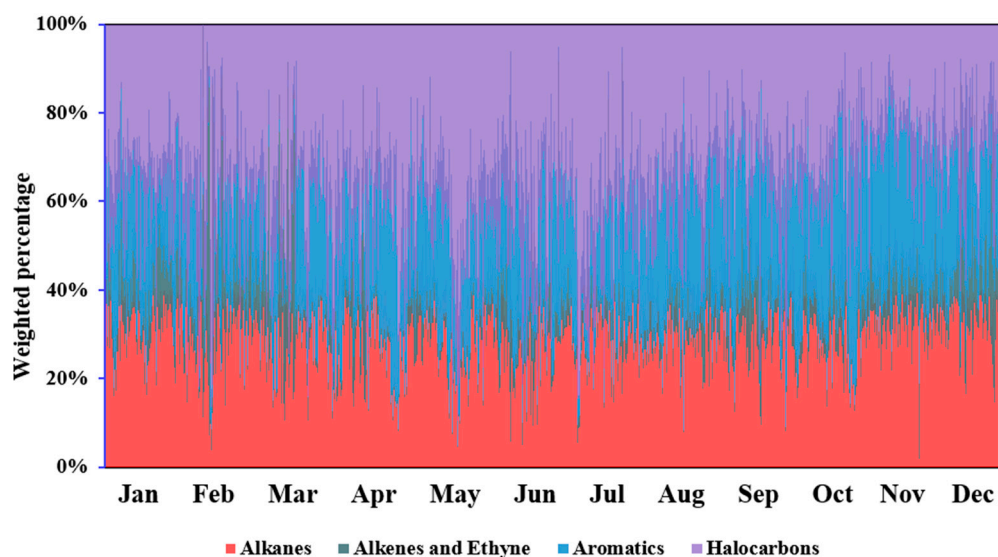

Figure S4. Temporal variations in VOC composition in 2018.

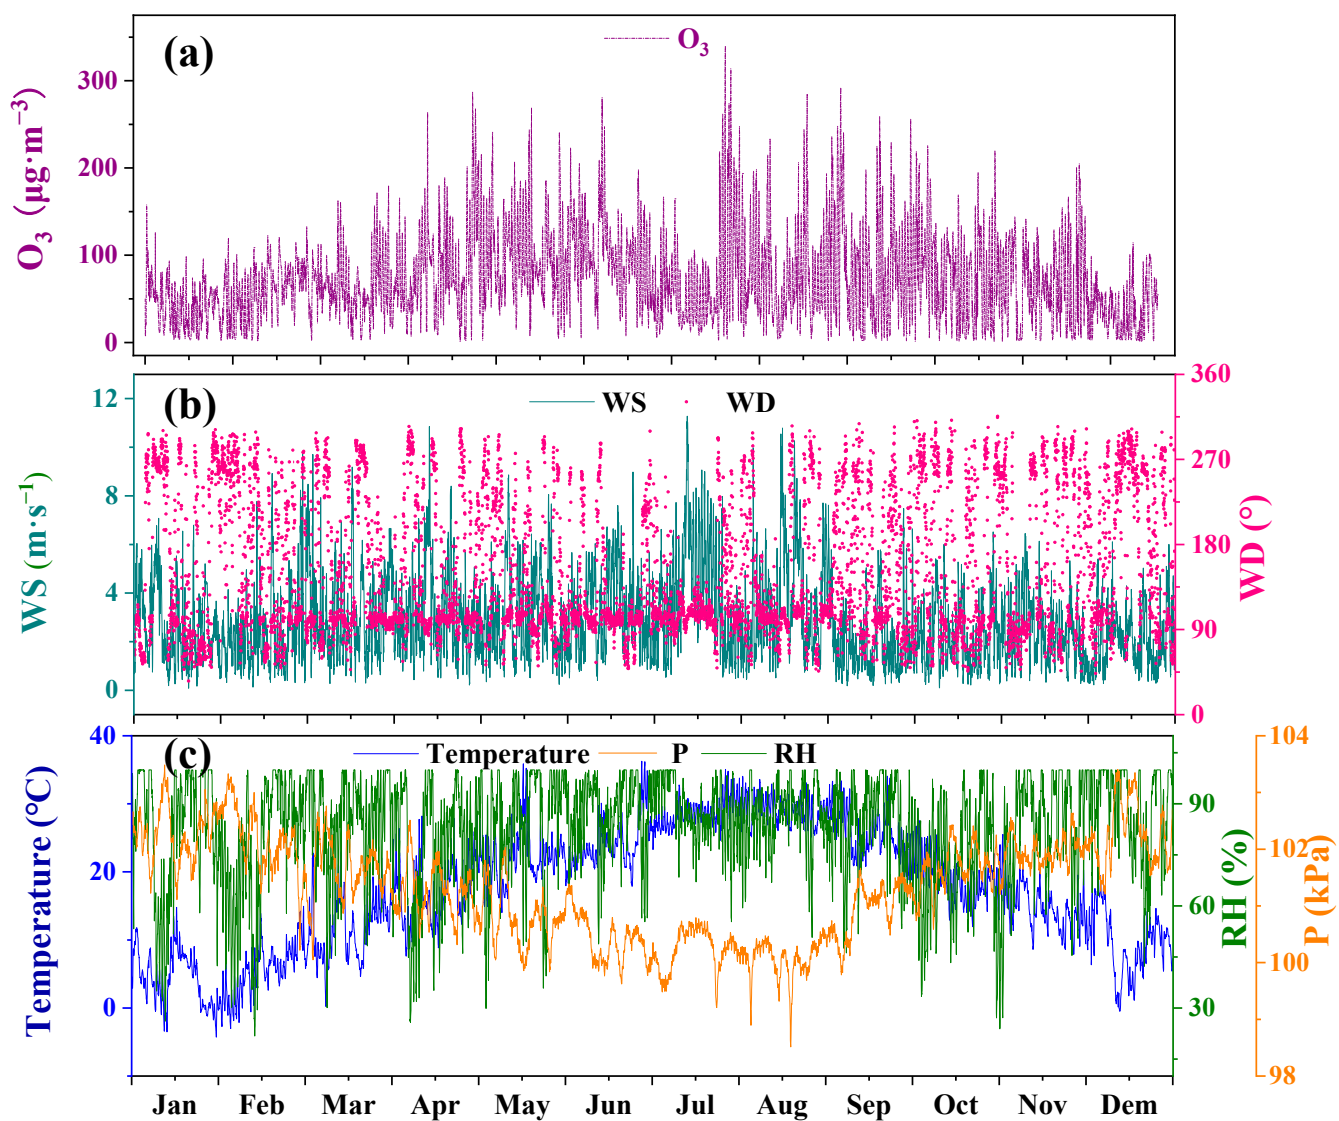

Figure S5. Time series of  $O_3$  (a) and meteorological parameters, including WS, WD (b) and Temperature, RH, and P (c) in 2018.

The Pearson correlation coefficients (PCCs) for the 70 VOC species are shown in **Fig. S5**. The PCCs among 2-methylpentane, n-hexane, and methylcyclopentane were all approximately 0.99. At the same time, the PCCs among the C8-C12 alkanes were approximately 0.8, and even reached approximately 0.9 within isomers. In addition, the PCCs between C8-C12 alkanes and C8-C9 aromatics were strong, with most values reaching 0.8. Additionally, the PCCs of the C8-C9 aromatics were larger than 0.84 and mostly close to 1. However, the correlations of halocarbons were relatively weak. The PCCs for 1,2-dichloromethane, carbon tetrachloride, dimethylbutane and 1,3-dichloropropene were approximately 0.8, and the PCCs were 0.82, 0.98 and 0.80 for 2,2-dimethylbutane and isoprene, cis-2-butene and cyclopentane, benzene and 1,2-dichloroethane, respectively. Then, the VOC species ultimately used for fittings with the GBDT model, which were selected based on the stability of the species, the integrity of the monitoring data and the correlation analysis, were n-butane, n-hexane, n-undecane, ethane, cis-2-pentene, 1,3-butadiene, isoprene, toluene, methyl chloride, dichloromethane, and 1,2-dichloroethane.

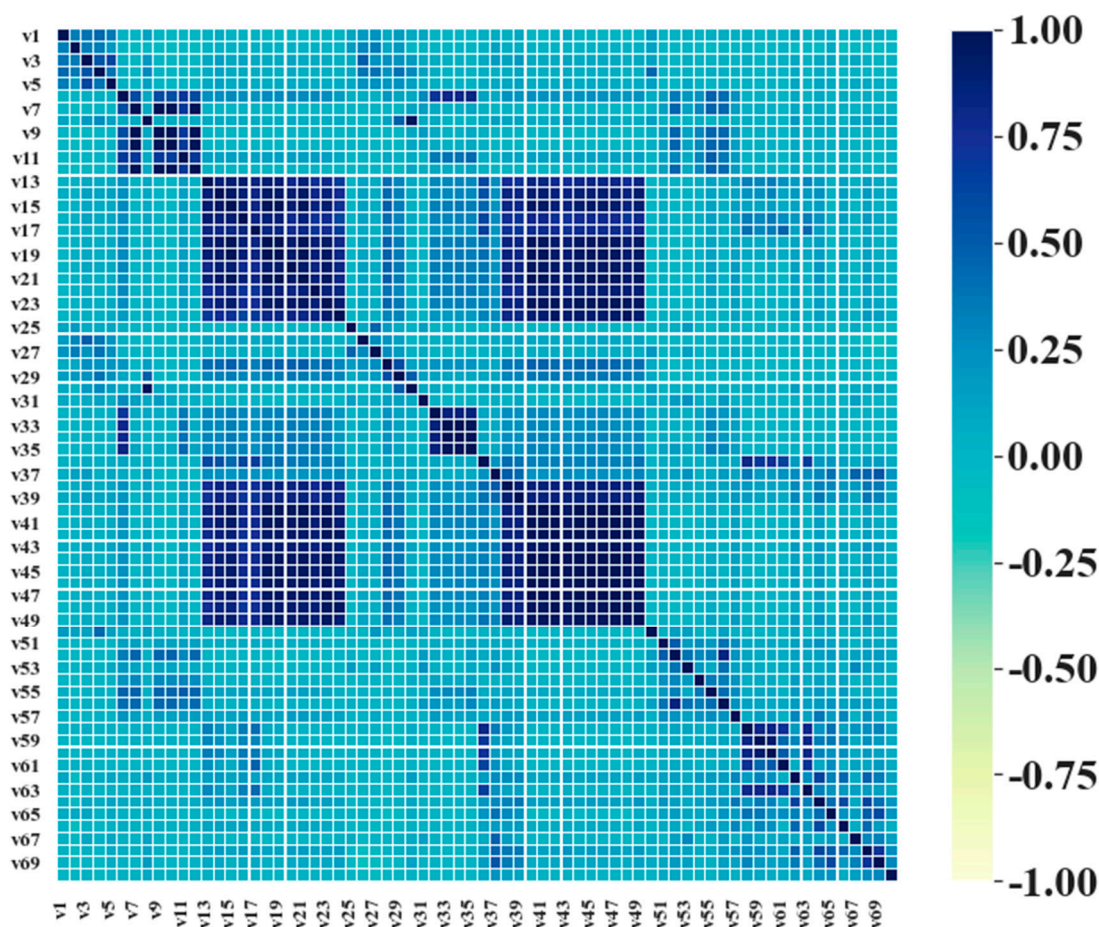

**Figure. S6.** Heat map for the correlation of 70 VOC species. Note: v1-v70 in this map corresponds to v1-v70 in Table S1.



**Table S2.** Parameters with the best performance indices under different conditions for LTP and HTP. Note: “/” indicates failed fittings for small datasets after deletion.

| Missing values processing |                           | Deletion          |                      | Interpolation             |                   |                      |
|---------------------------|---------------------------|-------------------|----------------------|---------------------------|-------------------|----------------------|
| Feature selection process | Without feature selection | Feature selection |                      | Without feature selection | Feature selection |                      |
|                           |                           | Functional groups | Correlation analysis |                           | Functional groups | Correlation analysis |
| M <sub>4-10</sub>         | Learning rate             | 0.1               | 0.05                 | 0.05                      | 0.05              | 0.05                 |
|                           | Max depth                 | /                 | 6                    | 5                         | 6                 | 5                    |
|                           | n-estimators              | 2000              | 2000                 | 2000                      | 2000              | 2000                 |

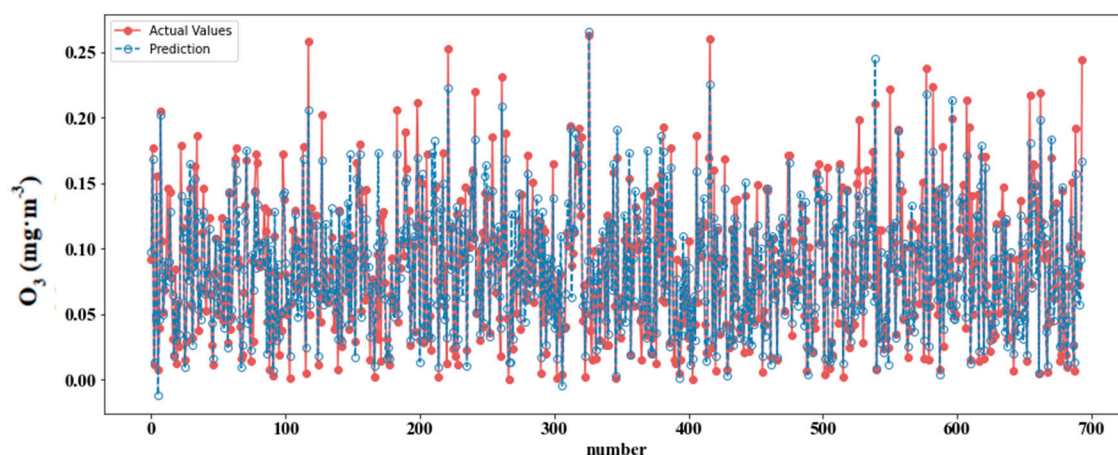

**Figure S7.** Concentrations of ozone predicted by the GBDT model and the corresponding actual values.
